# Supplementary material for: Solvent-controlled three families of Zn(ii) coordination compounds: synthesis, crystal structure, solvent-induced structural transformation, supramolecular isomerism and photoluminescence
Source: Royal Society of Chemistry journal article supplement (doi:10.1039/c4dt03868a), 2015-01-01
Supplement: c4dt03868a1.pdf [file c4dt03868a1.pdf]

## Electronic Supplementary Information (ESI)

# Solvent-controlled Three Families of Zn(II) Coordination Compounds: Synthesis, Crystal structure, Solvent-Induced Structural Transformation, Supramolecular Isomerism and Photoluminescence

Lu-Lu Han,<sup>a,⊥</sup> Tuo-Ping Hu,<sup>b,⊥</sup> Kai Mei,<sup>a</sup> Zhi-Min Guo,<sup>a</sup> Chen Yin,<sup>a</sup> Ya-Xin Wang,<sup>a</sup> Jun Zheng,<sup>c</sup> Xing-Po Wang<sup>a</sup> and Di Sun,<sup>\*,a</sup>

<sup>a</sup>Key Lab for Colloid and Interface Chemistry of Education Ministry, School of Chemistry and Chemical Engineering, Shandong University, Jinan, 250100, People's Republic of China. E-mail: dsun@sdu.edu.cn; Fax: 86-531-88364218.

<sup>b</sup>Department of Chemistry, North University of China, Taiyuan, Shanxi 030051, People's Republic of China.

<sup>c</sup>Center of Modern Experimental Technology, Anhui University, Hefei 230039, People's Republic of China.

<sup>⊥</sup>These authors contributed equally.

## Content

|                                                                       |   |
|-----------------------------------------------------------------------|---|
| (1) Fig. S1: XRD spectra of 1-6. ....                                 | 2 |
| (2) Fig. S2: IR of 1-6. ....                                          | 3 |
| (3) Fig. S3: UV-Vis spectra for 1-6. ....                             | 4 |
| (4) Fig. S4: Luminescence spectra of bpz. ....                        | 4 |
| (5) Table S1: Selected bond lengths and angles of Compounds 1-6. .... | 5 |
| (6) Table S2: Hydrogen bond parameters of Compound 1-6. ....          | 6 |

**(1) Fig. S1: XRD spectra of 1-6.**

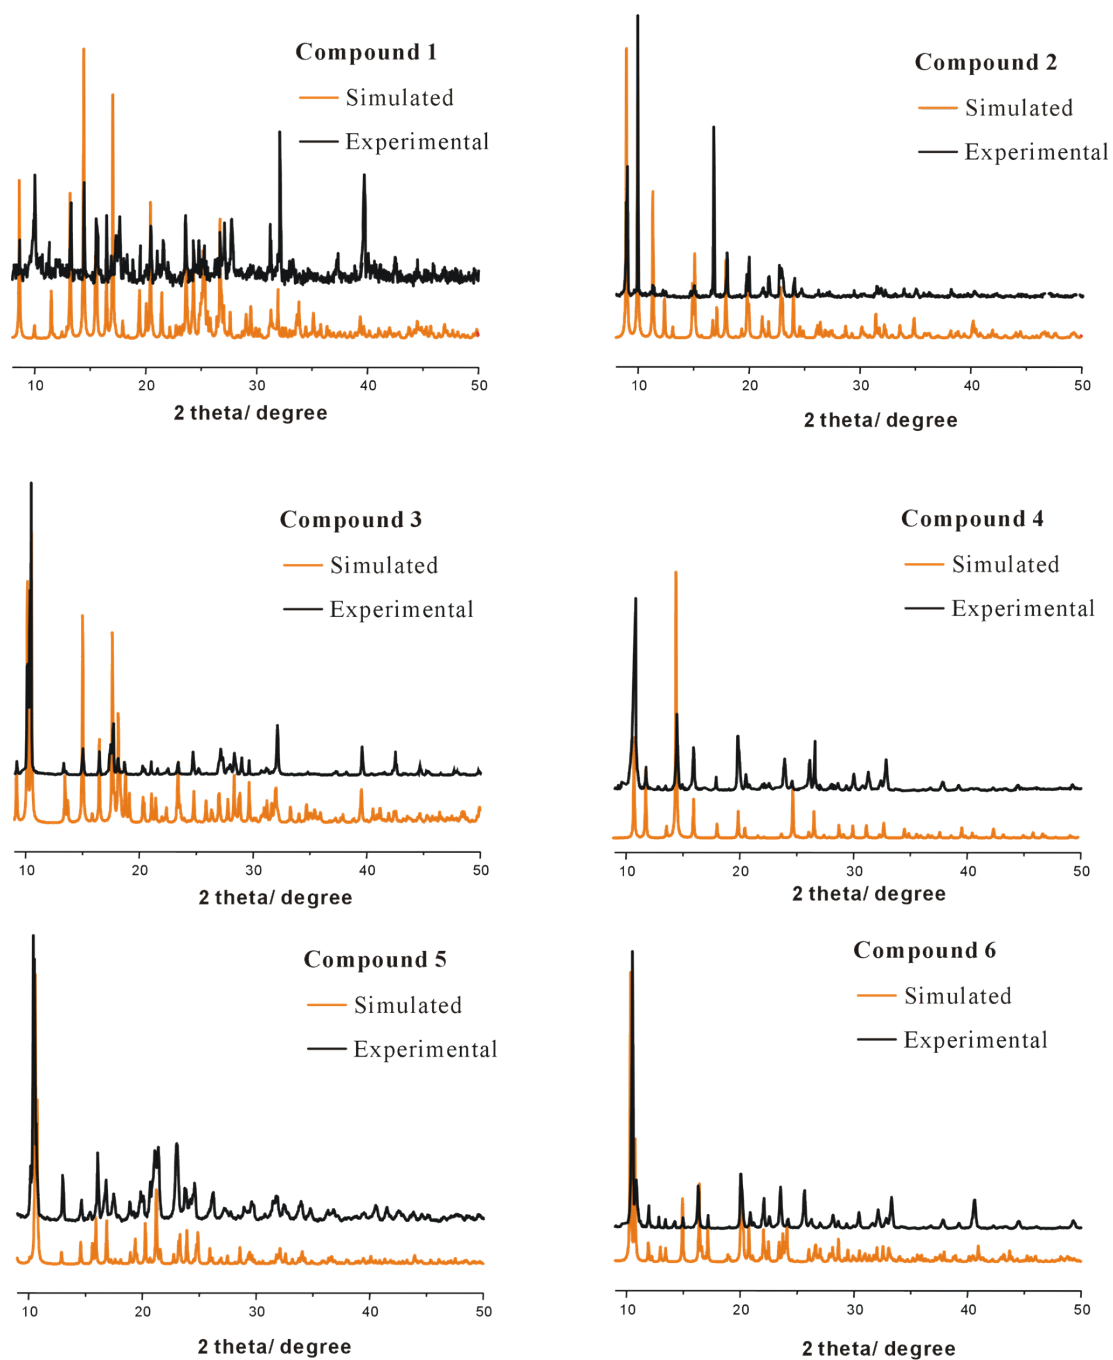

(2) Fig. S2: IR of 1-6.

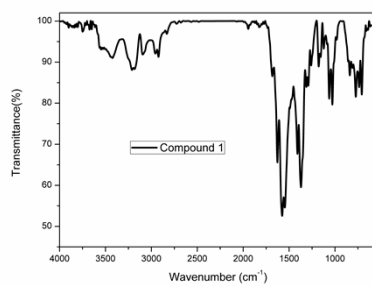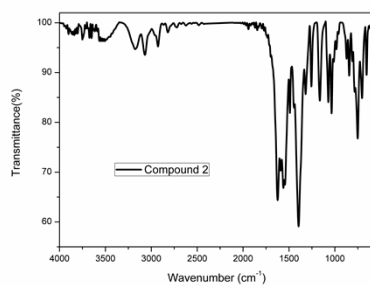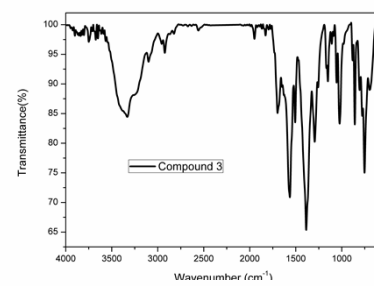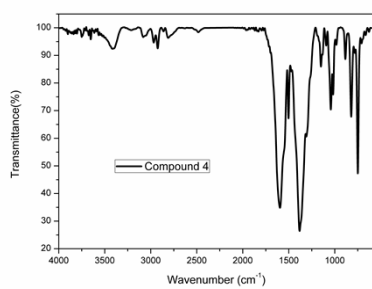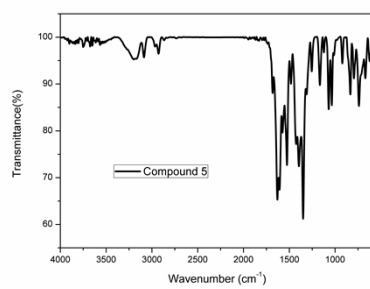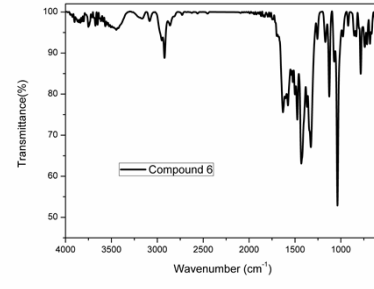

(3) Fig. S3: UV-Vis spectra for 1-6.

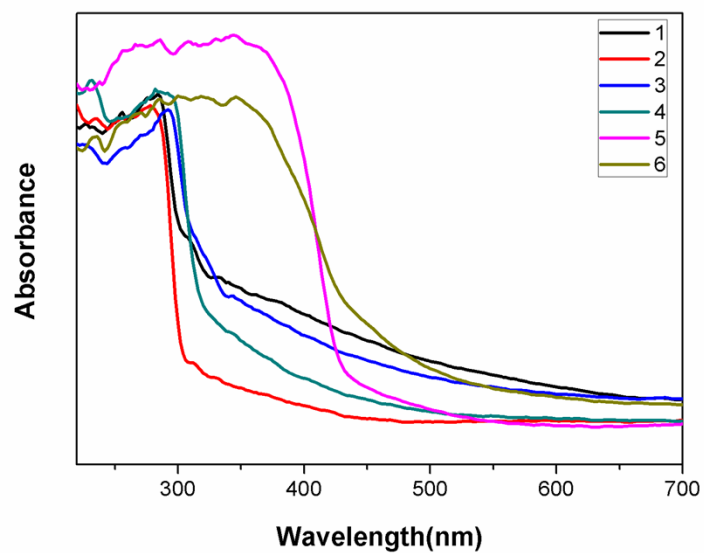

(4) Fig. S4: Luminescence spectra of bpz.

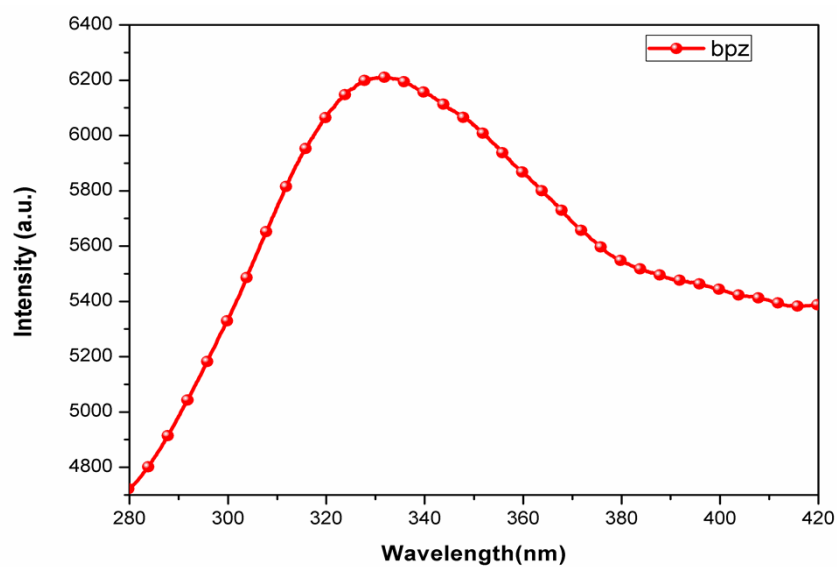

**(5) Table S1: Selected bond lengths and angles of Compounds 1-6.**

|                                                                     |            |                                       |             |                                       |             |
|---------------------------------------------------------------------|------------|---------------------------------------|-------------|---------------------------------------|-------------|
| Compound 1                                                          |            |                                       |             |                                       |             |
| Zn1—O1W                                                             | 2.021 (2)  | Zn1—O2W                               | 2.2007 (14) | Zn1—N1                                | 2.0481 (15) |
| O1W—Zn1—N1                                                          | 115.89 (5) | O1W—Zn1—O2W                           | 86.80 (4)   | N1—Zn1—N1 <sup>i</sup>                | 128.23 (9)  |
| N1—Zn1—O2W                                                          | 93.27 (6)  | N1—Zn1—O2W <sup>i</sup>               | 89.53 (6)   | O2W <sup>i</sup> —Zn1—O2W             | 173.59 (8)  |
| Symmetry code: (i) $-x+1, y, -z+1/2$ .                              |            |                                       |             |                                       |             |
| Compound 2                                                          |            |                                       |             |                                       |             |
| Zn1—O1                                                              | 2.026 (5)  | Zn1—O4 <sup>i</sup>                   | 1.944 (5)   | Zn1—N1                                | 2.037 (5)   |
| Zn1—N4 <sup>ii</sup>                                                | 2.053 (5)  |                                       |             |                                       |             |
| N1—Zn1—N4 <sup>ii</sup>                                             | 113.0 (2)  | O1—Zn1—N1                             | 93.3 (2)    | O1—Zn1—N4 <sup>ii</sup>               | 98.2 (2)    |
| O4 <sup>i</sup> —Zn1—N1                                             | 111.5 (2)  | O4 <sup>i</sup> —Zn1—O1               | 141.9 (2)   | O4 <sup>i</sup> —Zn1—N4 <sup>ii</sup> | 97.8 (2)    |
| Symmetry codes: (i) $-x+1, -y, z+1/2$ ; (ii) $x-1/2, -y+1/2, z$ .   |            |                                       |             |                                       |             |
| Compound 3                                                          |            |                                       |             |                                       |             |
| Zn1—O1W                                                             | 2.038 (2)  | Zn1—N1                                | 2.159 (3)   | Zn1—N3 <sup>i</sup>                   | 2.197 (3)   |
| Zn1—O1                                                              | 2.253 (2)  | Zn1—O2                                | 2.129 (2)   | Zn1—O3                                | 2.057 (2)   |
| O1W—Zn1—O1                                                          | 92.07 (9)  | O1W—Zn1—O2                            | 152.11 (9)  | O1W—Zn1—O3                            | 99.27 (9)   |
| O1W—Zn1—N1                                                          | 90.27 (10) | O1W—Zn1—N3 <sup>i</sup>               | 90.81 (10)  | O2—Zn1—O1                             | 60.04 (8)   |
| O2—Zn1—N1                                                           | 90.96 (10) | O2—Zn1—N3 <sup>i</sup>                | 89.23 (10)  | O3—Zn1—O1                             | 168.63 (9)  |
| O3—Zn1—O2                                                           | 108.61 (9) | O3—Zn1—N1                             | 89.17 (10)  | O3—Zn1—N3 <sup>i</sup>                | 88.24 (10)  |
| N1—Zn1—O1                                                           | 91.50 (9)  | N1—Zn1—N3 <sup>i</sup>                | 177.32 (10) | N3 <sup>i</sup> —Zn1—O1               | 90.91 (9)   |
| Symmetry code: (i) $x+1/2, -y+1/2, z-1/2$ .                         |            |                                       |             |                                       |             |
| Compound 4                                                          |            |                                       |             |                                       |             |
| Zn1—O2                                                              | 1.941 (6)  | Zn1—N2                                | 2.007 (7)   |                                       |             |
| O2—Zn1—N2                                                           | 107.5 (3)  | O2—Zn1—N2 <sup>i</sup>                | 114.3 (3)   | O2 <sup>i</sup> —Zn1—O2               | 102.3 (5)   |
| N2 <sup>i</sup> —Zn1—N2                                             | 110.8 (4)  |                                       |             |                                       |             |
| Symmetry code: (i) $-x+y+1, y, -z+2/3$ .                            |            |                                       |             |                                       |             |
| Compound 5                                                          |            |                                       |             |                                       |             |
| Zn1—O1                                                              | 1.981 (5)  | Zn1—O4 <sup>i</sup>                   | 1.961 (5)   | Zn1—N2                                | 2.017 (7)   |
| Zn1—N3                                                              | 1.999 (8)  |                                       |             |                                       |             |
| O1—Zn1—N2                                                           | 99.6 (3)   | O1—Zn1—N3                             | 97.1 (3)    | O4 <sup>i</sup> —Zn1—O1               | 135.9 (2)   |
| O4 <sup>i</sup> —Zn1—N2                                             | 101.5 (3)  | O4 <sup>i</sup> —Zn1—N3               | 111.0 (3)   | N3—Zn1—N2                             | 110.3 (3)   |
| Symmetry code: (i) $-x+3/2, y-1/2, -z+2$ .                          |            |                                       |             |                                       |             |
| Compound 6                                                          |            |                                       |             |                                       |             |
| Zn1—O1                                                              | 1.982 (7)  | Zn1—O4 <sup>i</sup>                   | 1.923 (7)   | Zn1—N1                                | 2.030 (8)   |
| Zn1—N3 <sup>ii</sup>                                                | 1.988 (9)  |                                       |             |                                       |             |
| O1—Zn1—N1                                                           | 101.3 (3)  | O1—Zn1—N3 <sup>ii</sup>               | 98.7 (3)    | O4 <sup>i</sup> —Zn1—O1               | 134.0 (3)   |
| O4 <sup>i</sup> —Zn1—N1                                             | 97.3 (3)   | O4 <sup>i</sup> —Zn1—N3 <sup>ii</sup> | 111.8 (3)   | N3 <sup>ii</sup> —Zn1—N1              | 113.2 (3)   |
| Symmetry codes: (i) $-x+2, -y+1, z-1/2$ ; (ii) $x+1/2, -y+3/2, z$ . |            |                                       |             |                                       |             |

**(6) Table S2: Hydrogen bond parameters of Compound 1-6.**

| Compound 1                                                                                                    |      |       |            |         |
|---------------------------------------------------------------------------------------------------------------|------|-------|------------|---------|
| D—H···A                                                                                                       | D—H  | H···A | D···A      | D—H···A |
| O1W—H1WA···O4 <sup>ii</sup>                                                                                   | 0.89 | 1.96  | 2.686 (2)  | 136.9   |
| O1W—H1WB···O4 <sup>iii</sup>                                                                                  | 0.90 | 1.92  | 2.686 (2)  | 142.2   |
| O2W—H2WA···O3 <sup>ii</sup>                                                                                   | 0.87 | 2.11  | 2.917 (2)  | 152.9   |
| O2W—H2WB···N3 <sup>iv</sup>                                                                                   | 0.88 | 1.96  | 2.792 (2)  | 158.1   |
| N2—H2···O3 <sup>iii</sup>                                                                                     | 0.86 | 2.12  | 2.975 (2)  | 174.9   |
| N4—H4···O1 <sup>v</sup>                                                                                       | 0.86 | 2.05  | 2.903 (2)  | 175.2   |
| O2—H2A···O3                                                                                                   | 0.82 | 1.64  | 2.457 (3)  | 175.9   |
| Symmetry codes: (ii) x, -y+1, z-1/2; (iii) -x+1, -y+1, -z+1; (iv) -x+3/2, y-1/2, -z+1/2; (v) x+1/2, y+1/2, z. |      |       |            |         |
| Compound 2                                                                                                    |      |       |            |         |
| D—H···A                                                                                                       | D—H  | H···A | D···A      | D—H···A |
| N2—H2···O2 <sup>iii</sup>                                                                                     | 0.86 | 1.86  | 2.713 (8)  | 173.2   |
| N3—H3···O3 <sup>iv</sup>                                                                                      | 0.86 | 1.86  | 2.684 (7)  | 159.3   |
| N3—H3···O1 <sup>iv</sup>                                                                                      | 0.86 | 2.64  | 3.120 (7)  | 116.9   |
| Symmetry codes: (iii) -x+1, -y, z-1/2; (iv) x+1/2, -y+1/2, z.                                                 |      |       |            |         |
| Compound 3                                                                                                    |      |       |            |         |
| D—H···A                                                                                                       | D—H  | H···A | D···A      | D—H···A |
| N2—H2···O4                                                                                                    | 0.86 | 2.06  | 2.886 (4)  | 160.2   |
| N4—H4···O4 <sup>ii</sup>                                                                                      | 0.86 | 2.26  | 3.099 (4)  | 166.1   |
| O1W—H1WA···O2 <sup>iii</sup>                                                                                  | 0.87 | 1.88  | 2.607 (3)  | 140.4   |
| O1W—H1WB···O4 <sup>iii</sup>                                                                                  | 0.87 | 1.94  | 2.726 (3)  | 149.4   |
| O1W—H1WB···N4 <sup>i</sup>                                                                                    | 0.87 | 2.57  | 3.144 (4)  | 124.7   |
| Symmetry codes: (i) x+1/2, -y+1/2, z-1/2; (ii) x, y, z+1; (iii) x+1/2, -y+1/2, z+1/2.                         |      |       |            |         |
| Compound 4                                                                                                    |      |       |            |         |
| D—H···A                                                                                                       | D—H  | H···A | D···A      | D—H···A |
| N1—H1···O1 <sup>i</sup>                                                                                       | 0.86 | 1.87  | 2.663 (10) | 152.5   |
| Symmetry code: (i) -x+y+1, y, -z+2/3.                                                                         |      |       |            |         |
| Compound 5                                                                                                    |      |       |            |         |
| D—H···A                                                                                                       | D—H  | H···A | D···A      | D—H···A |
| N4—H4A···O2 <sup>ii</sup>                                                                                     | 0.90 | 1.80  | 2.69 (2)   | 169.5   |
| Symmetry code: (ii) -x+3/2, y+1/2, -z+2.                                                                      |      |       |            |         |
| Compound 6                                                                                                    |      |       |            |         |
| D—H···A                                                                                                       | D—H  | H···A | D···A      | D—H···A |
| N2—H2···O3                                                                                                    | 0.88 | 1.85  | 2.699 (12) | 162.8   |
| N4—H4···O2 <sup>iii</sup>                                                                                     | 0.88 | 1.81  | 2.691 (12) | 178.1   |
| Symmetry code: (iii) -x+3/2, y+1/2, z+1/2.                                                                    |      |       |            |         |
